# Supplementary material for: Deposition of metallic silver coatings by Aerosol Assisted MOCVD using two new silver β-diketonate adduct metalorganic precursors
Source: Royal Society of Chemistry journal article supplement (doi:10.1039/c7dt01647f), 2017-01-01
Supplement: c7dt01647f1.pdf [file c7dt01647f1.pdf]

## SUPPORTING INFORMATION

### Deposition of metallic silver coatings by Aerosol Assisted MOCVD using two new silver $\beta$ -Diketonate adduct metalorganic precursors

H. Liu<sup>a</sup>, S. Battiato<sup>b</sup>, A. L. Pellegrino<sup>b</sup>, P. Paoli<sup>c</sup>, P. Rossi<sup>c</sup>, C. Jiménez<sup>a</sup>, G. Malandrino<sup>b</sup> and D. Muñoz-Rojas<sup>a,\*</sup>

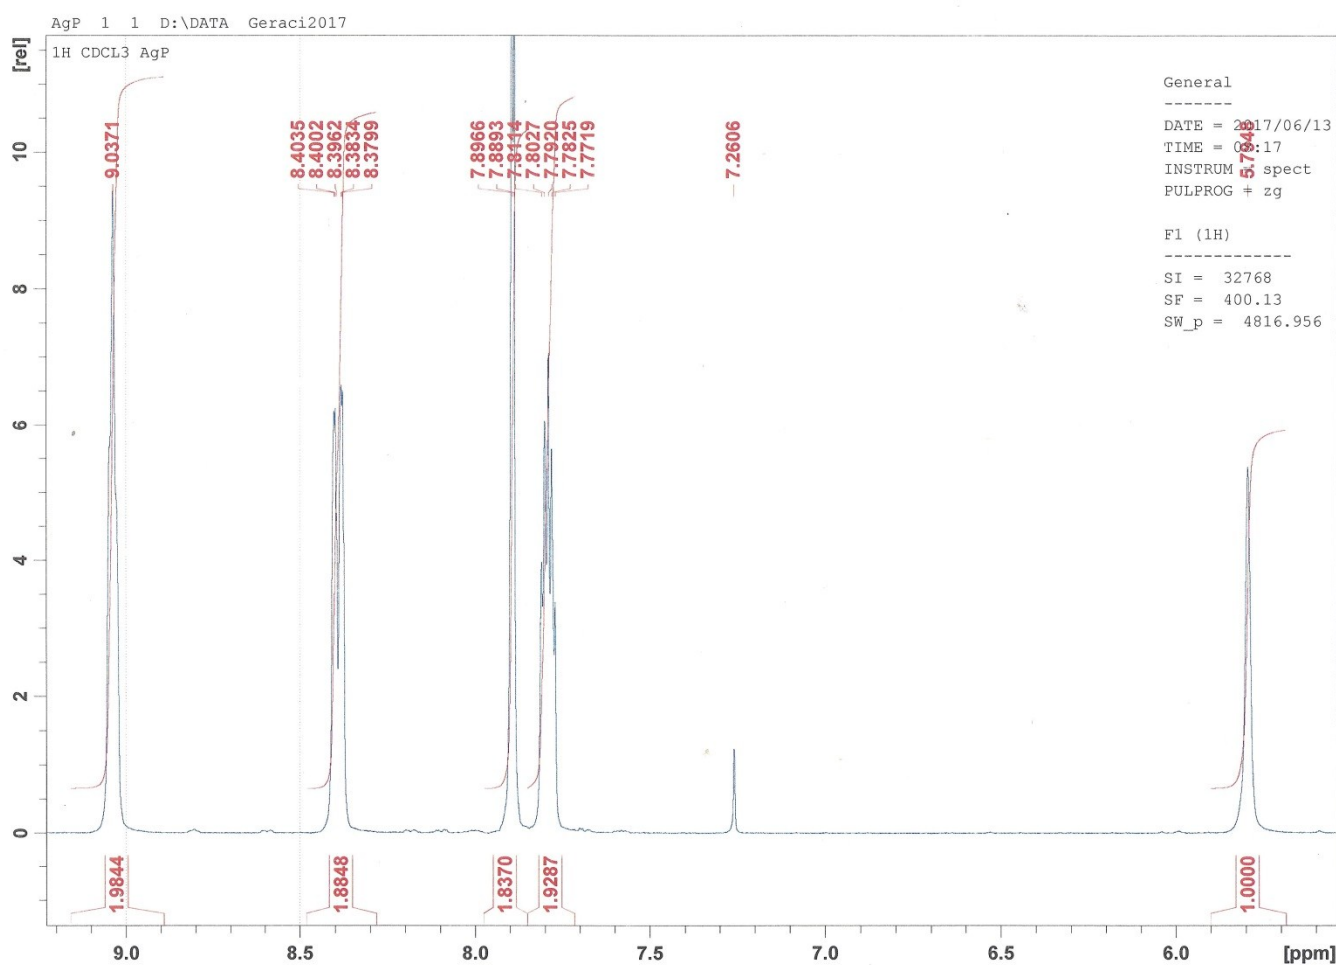

Figure. S01. <sup>1</sup>H NMR spectrum of AgP in CDCl<sub>3</sub>.

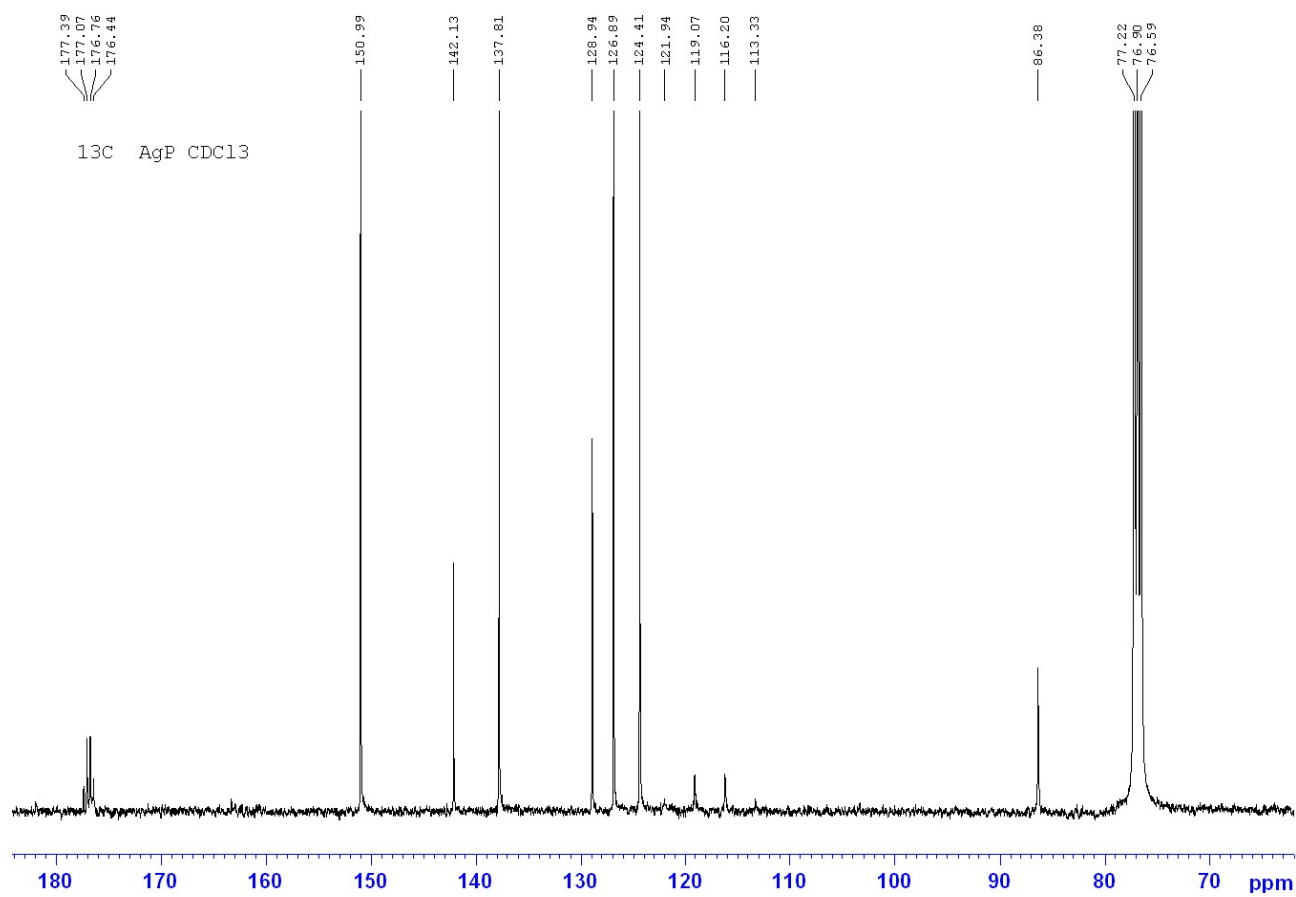

**Figure. S02.** <sup>13</sup>C NMR spectrum of AgP in CDCl<sub>3</sub>.

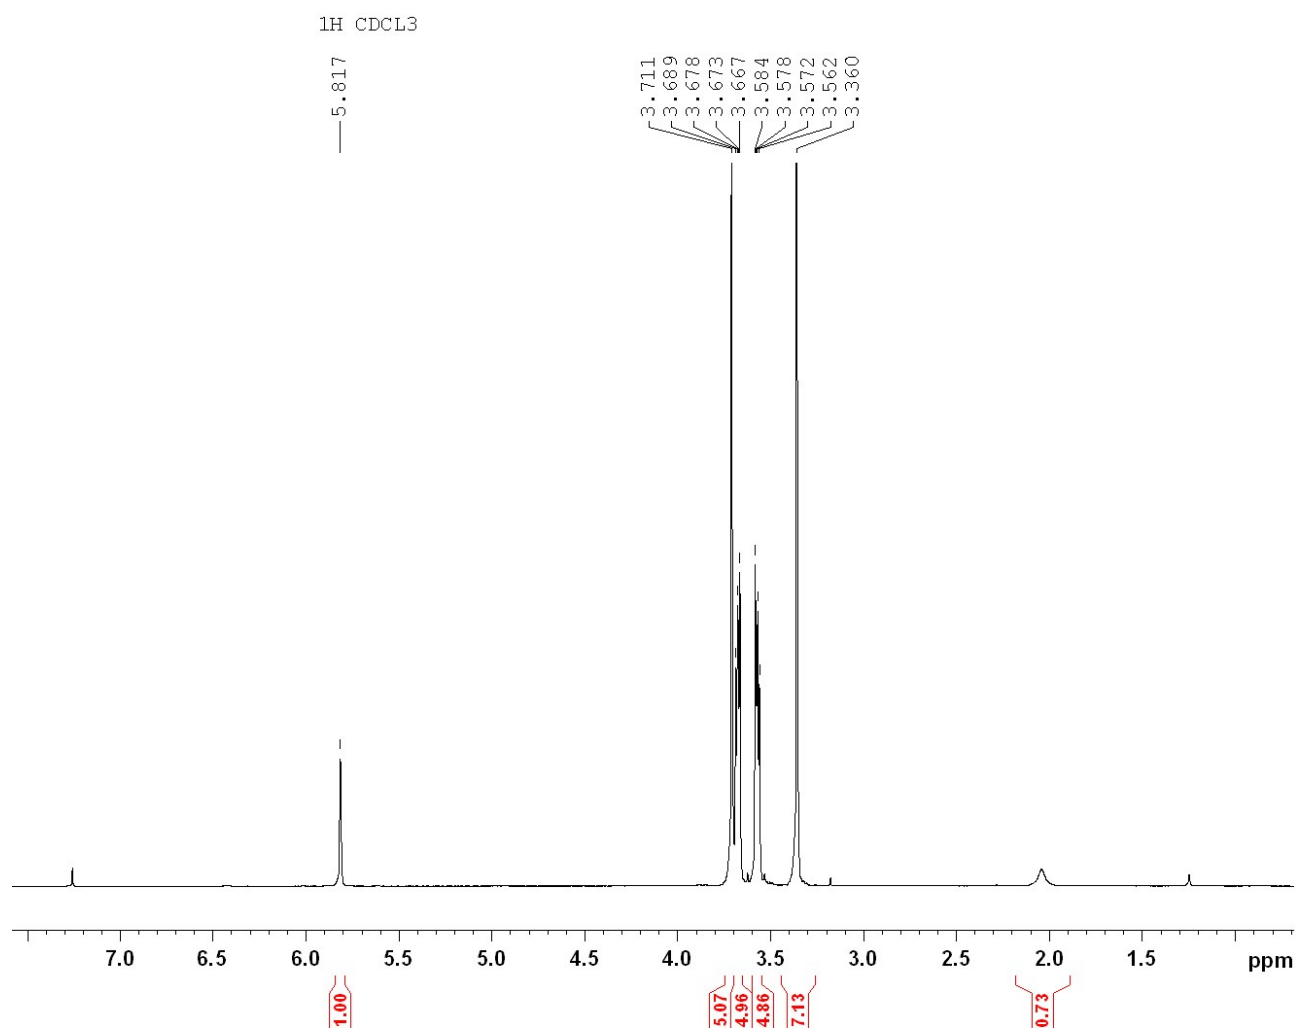

**Figure. S03.** <sup>1</sup>H NMR spectrum of AgT in CDCl<sub>3</sub>.

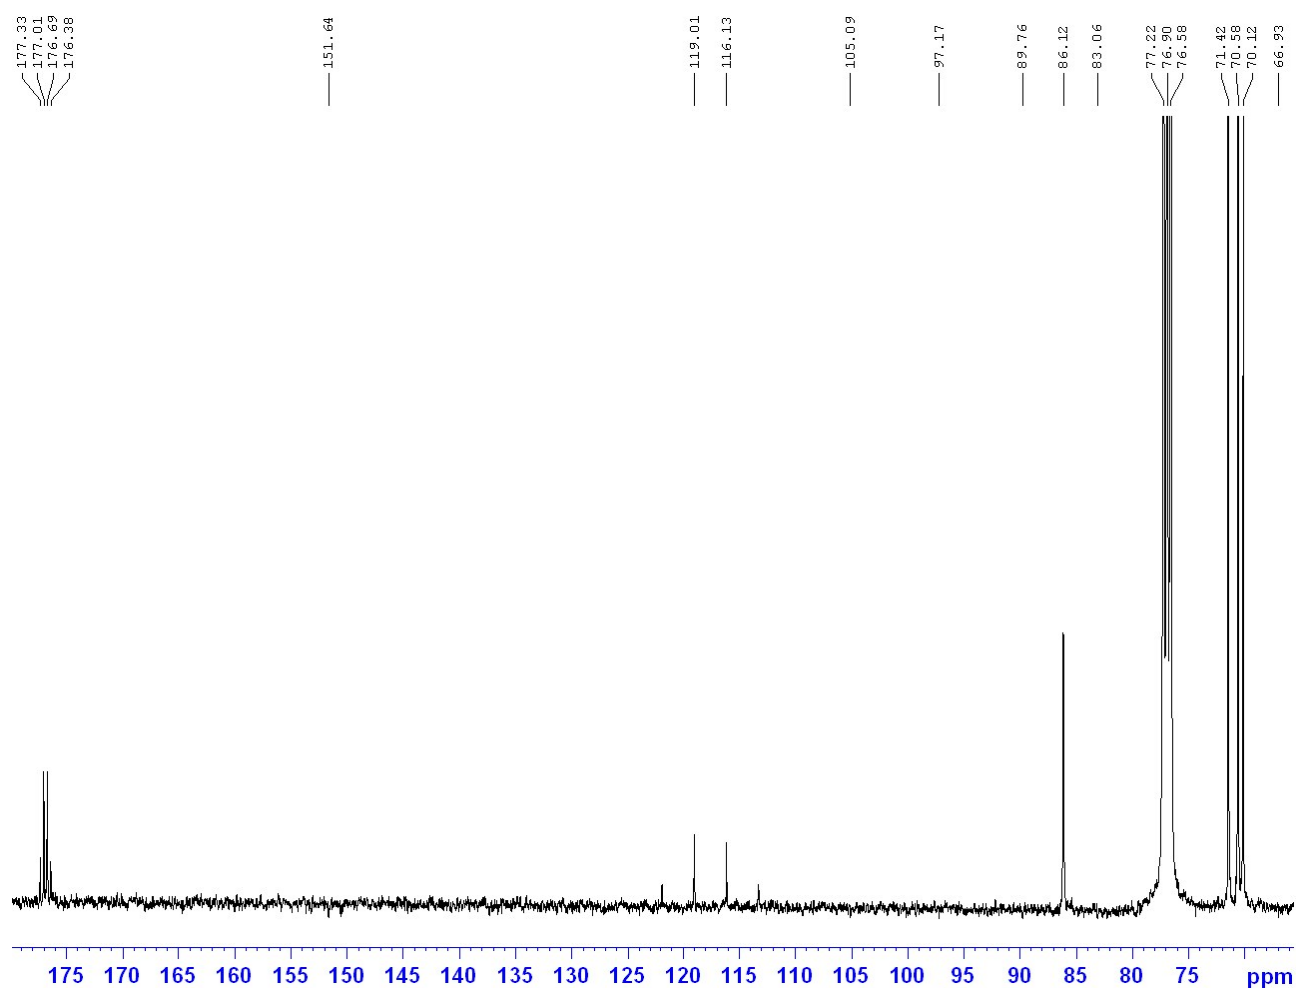

**Figure. S04.**  $^{13}\text{C}$  NMR spectrum of AgT in  $\text{CDCl}_3$ .

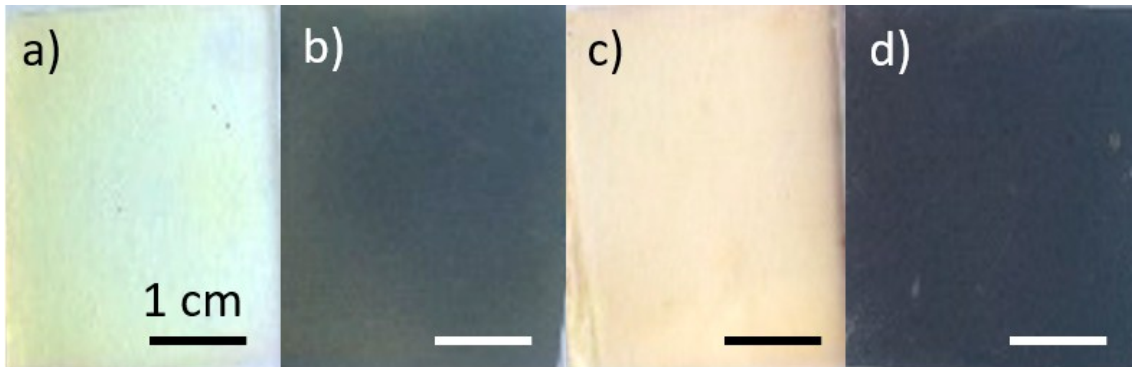

**Figure. S05** Images of silver coatings: a) P1 (yellow), b) P2 (dark in the picture but with a purple hue to the naked eye), c) T1 (orange), d) T2 (as for P2, dark in the image but having a purple hue to the naked eye).

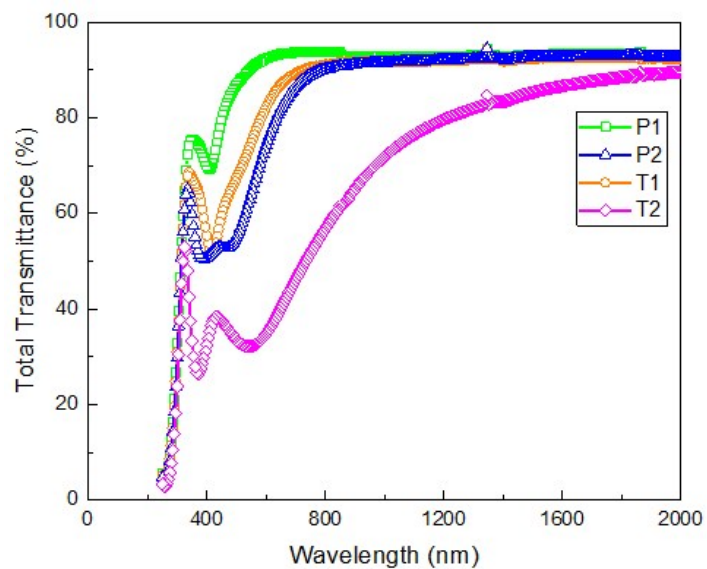

**Figure. S06** Transmittance spectra of Ag films deposited with different precursors AgP and AgT with deposition duration 0.5 h (P1 and T1) and 1.5 h (P2 and T2).

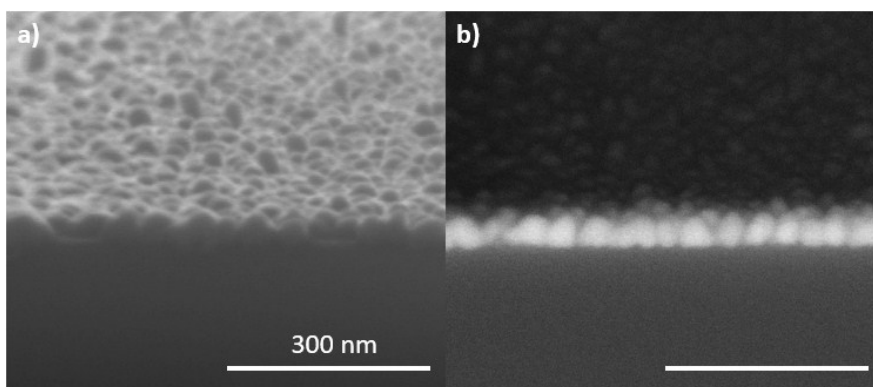

**Figure. S07** SEM Crosssection of sample T2 (deposited using AgT precursor for 1.5 h). a) Secondary electrons b) Back/scattered electrons. The height of the coating is about 35 nm.

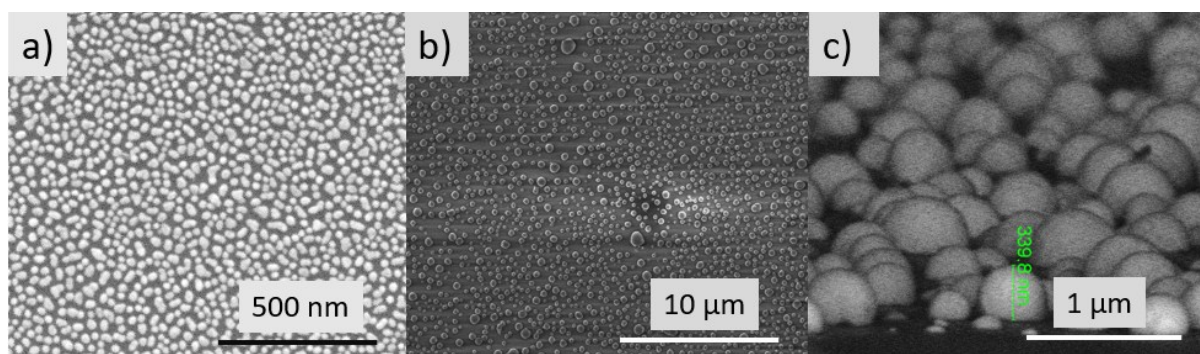

**Figure. S08** a) SEM image of the as deposited Ag coating (using AgP). Images b) and c) show SEM images of the coating after annealing at 400 °C in air for 1 h.
